# Supplementary material for: A versatile papaya mosaic virus (PapMV) vaccine platform based on sortase-mediated antigen coupling
Source: PubMed Central journal article supplement (PMC5516373; doi:10.1186/s12951-017-0289-y), 2017-07-18

A

PapMV WT: ...IQFLPPPE  
PapMV-SrtA(short): ...IQFLP----ETGGHHHHHH

B

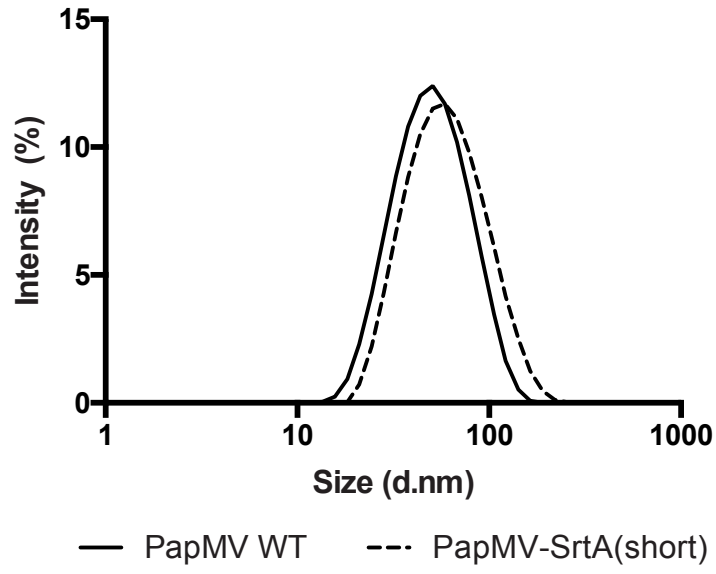

C

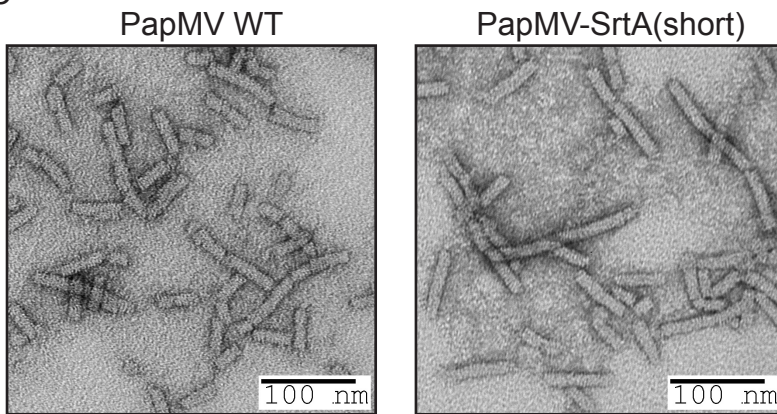

Supplement: 12951_2017_289_MOESM1_ESM.pdf [file 12951_2017_289_MOESM1_ESM.pdf]
