# Supplementary material for: A versatile papaya mosaic virus (PapMV) vaccine platform based on sortase-mediated antigen coupling
Source: PubMed Central journal article supplement (PMC5516373; doi:10.1186/s12951-017-0289-y), 2017-07-18

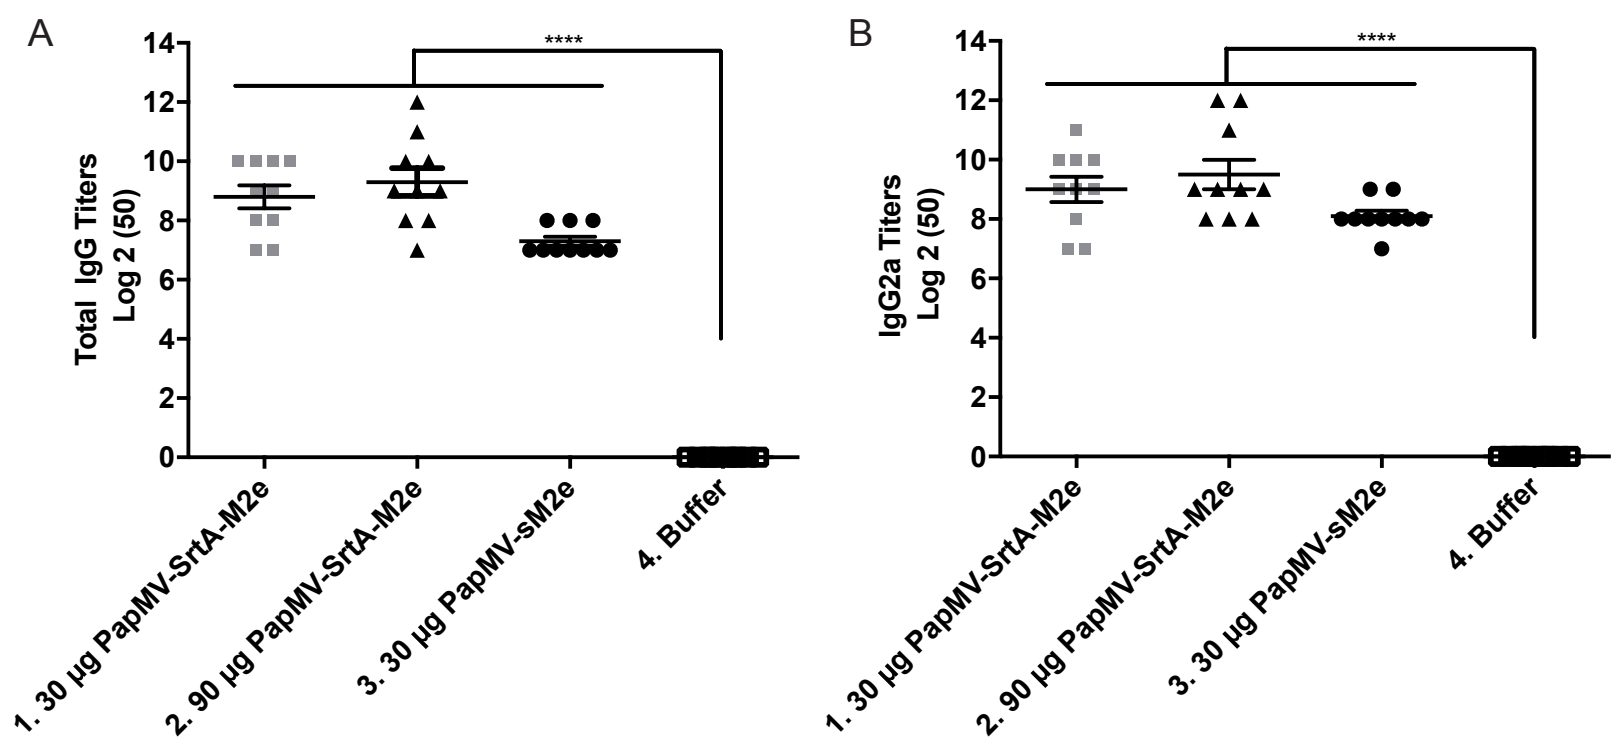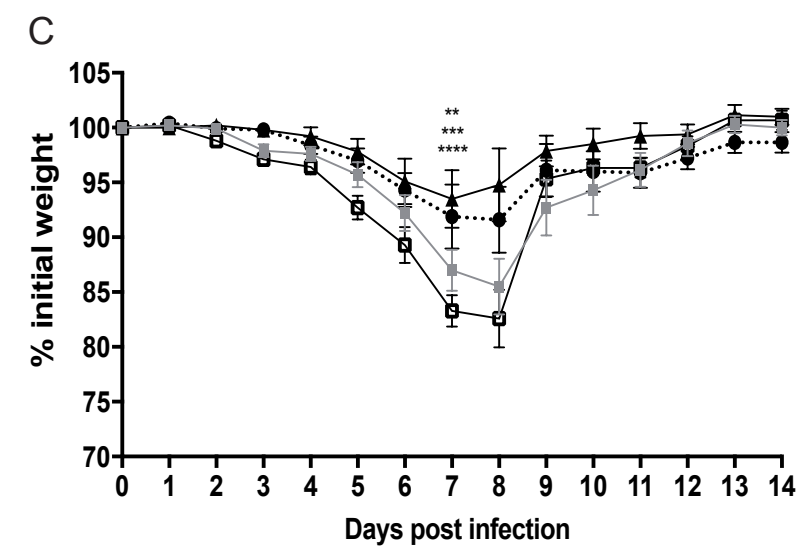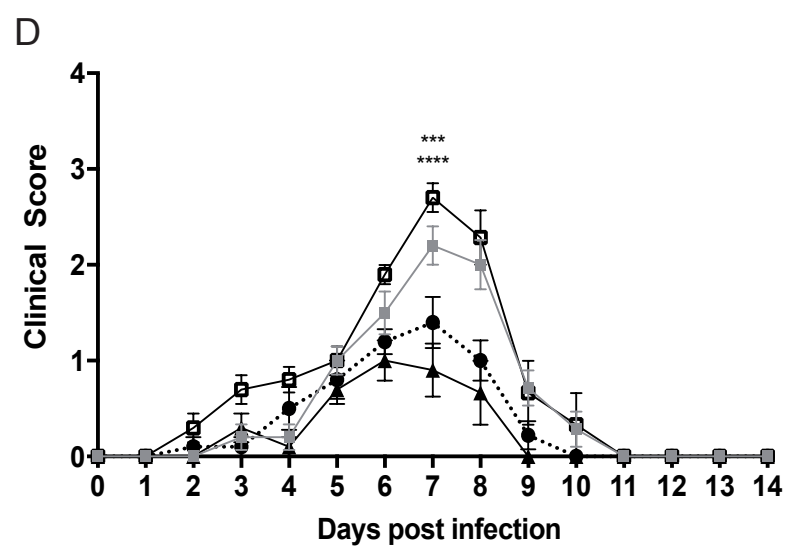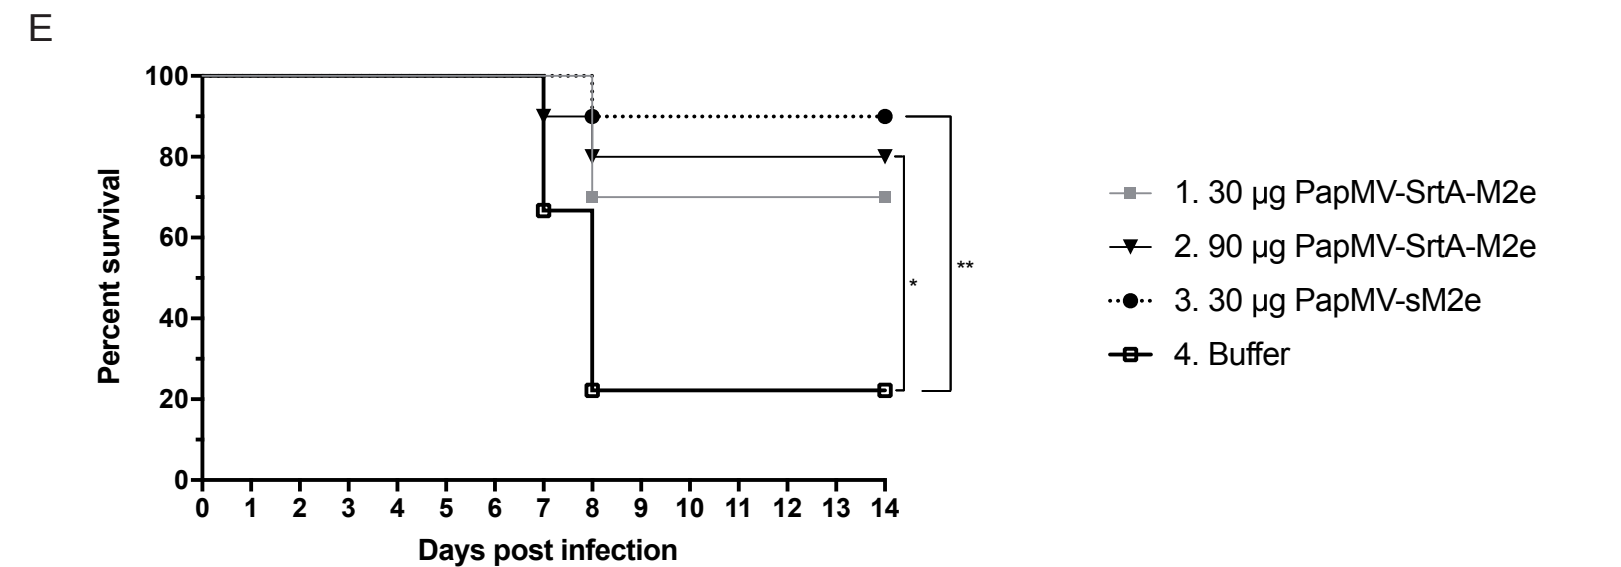

Supplement: 12951_2017_289_MOESM5_ESM.pdf [file 12951_2017_289_MOESM5_ESM.pdf]
